# Supplementary material
Source: Royal Society of Chemistry journal article supplement (doi:10.1039/d6qo00596a)
Supplement: d6qo00596a1.pdf [file d6qo00596a1.pdf]

## Supporting Information

### Unlocking XAT/HAT Selectivity: A Machine Learning-Guided Discovery of Governing Physicochemical Principles

Siqi Liu <sup>a,\*</sup>, Wenqiang Xu <sup>b</sup>, Tian-Yu Sun <sup>b,c</sup>, Longjie Huang <sup>a</sup>, Yun-Dong Wu <sup>b,d,\*</sup>,  
Xinhao Zhang <sup>b,c,\*</sup>

a. College of Chemistry and Materials Science, Shanghai Normal University, Shanghai, 200234, China.

b. Key Laboratory of Computational Chemistry and Drug Design, State Key Laboratory of Chemical Oncogenomics, Shenzhen Key Laboratory of Chemical Genomics, School of Chemical Biology and Biotechnology, Peking University Shenzhen Graduate School, Shenzhen 518055, China.

c. Institute of Chemical Biology, Shenzhen Bay Laboratory, Shenzhen 518132, China.

d. College of Chemistry and Molecular Engineering, Peking University, Beijing 100871, China

\*. Corresponding authors

#### Contents

|                                                                                |    |
|--------------------------------------------------------------------------------|----|
| Supporting Information .....                                                   | 1  |
| 1. Details of the dataset used in model training.....                          | 2  |
| 1.1 Detailed substrates .....                                                  | 2  |
| 1.2 Benchmark of the theoretical levels for geometry optimization .....        | 3  |
| 1.3 Calculated <i>BDE</i> and <i>BO</i> .....                                  | 6  |
| 2. Details of machine learning .....                                           | 7  |
| 2.1 Generation of transition states geometries and corresponding barriers..... | 7  |
| 2.2 Details and calculations of descriptors .....                              | 8  |
| 2.3 Feature reduction based on Pearson relation coefficient .....              | 12 |
| 2.4 Machine learning algorithms .....                                          | 13 |
| 2.5 Feature importance .....                                                   | 14 |
| 3. Results for silyl radicals.....                                             | 15 |
| 4. References.....                                                             | 15 |

# 1. Details of the dataset used in model training

## 1.1 Detailed substrates

The distribution of organic halides within our dataset is illustrated in Figure S1, with corresponding optimization output files hosted on our GitHub repository (<https://github.com/liusqchem/machine-learning.git>). Sourced from the *iBonD* 2.0 database, the dataset includes 113 distinct C–H bonds and 61 C–X bonds (Figure S1). This selection was designed with a dual purpose. First, it ensures a broad representation of chemical and structural diversity, encompassing alkyl, cycloalkyl, (hetero)benzylic, aldehydic, and (hetero)aryl C–H and C–X motifs. The calculated bond dissociation energies (**BDEs**) range from 80–115 kcal/mol for C–H and 40–130 kcal/mol for C–X bonds (Figure S3), confirming that the dataset covers a wide and representative chemical space. Second, these **BDE** values serve as a benchmark to validate the reliability of our quantum chemical calculations (Figure S2). High-quality, chemically relevant training data is essential, as it directly governs the accuracy of the resulting machine learning (ML) models. To model radical abstraction, we considered a variety of abstracting agents, including C-, B-, N-, Si-, and S-centered radicals. Specifically, we selected 38 carbon-centered radicals—ranging from alkyl and  $\alpha$ -heteroatom-substituted species to captodative and  $sp^2$ -hybridized radicals—leading to a comprehensive set of 4,294 HAT and 2,318 XAT reactions. Furthermore, to assess the generalizability of the H/X selectivity patterns, we incorporated an additional array of experimental boryl, nitrogen-centered, silyl, and thiol radicals.

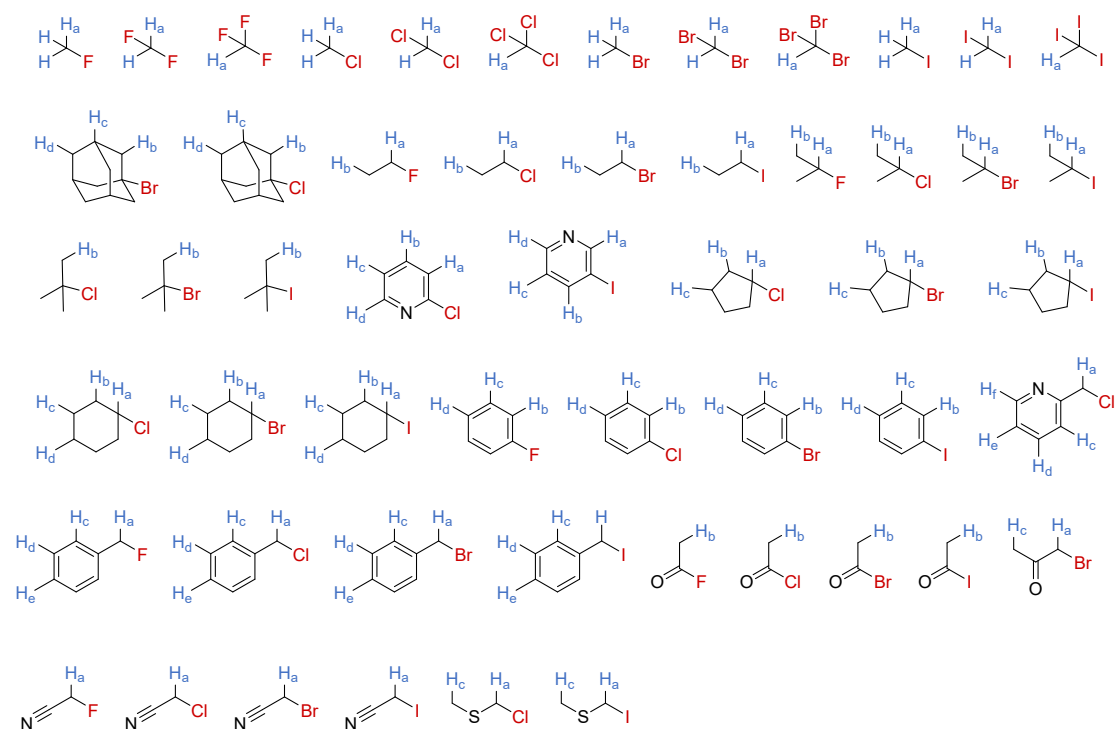

Figure S1. Compound details of organic halides

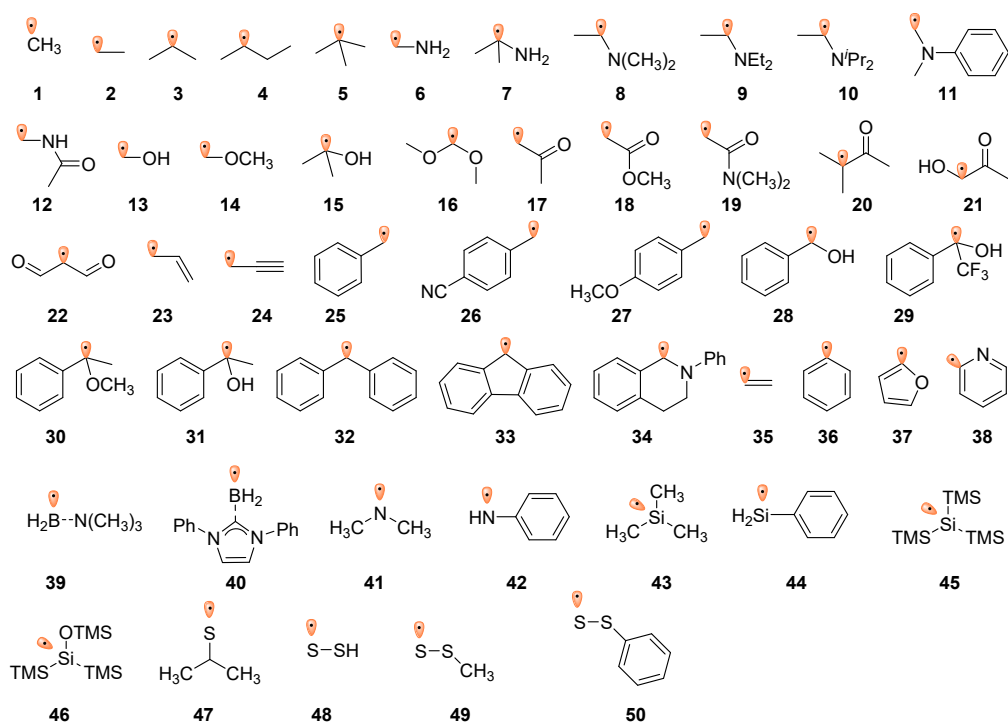

**Figure S2.** Compound details of radicals

## 1.2 Benchmark of the theoretical levels for geometry optimization

All DFT calculations were conducted with Gaussian 16<sup>2</sup>. Structural optimizations were performed at the (U)B3LYP-D3(BJ)<sup>3-6</sup> / Lanl2dz+d with ECP for I<sup>7, 8</sup>, and (U)B3LYP-D3(BJ) / 6-31+G(d,p)<sup>9</sup> for other atoms in the gas phase. Single point calculations were conducted at the (U)B3LYP-D3(BJ)/6-311++G(3df,3pd)<sup>9, 10</sup>-SDD<sup>11, 12</sup>. The calculated  $BDE_{C-H}$  and  $BDE_{C-X}$  and experimental  $BDE_{C-H}$  and  $BDE_{C-X}$  of organic halides are shown in Table S1.

**Table S1.** The calculated  $BDE_{C-H}$  and  $BDE_{C-X}$  and experimental  $BDE_{C-H}$  and  $BDE_{C-X}$  of organic halides (kcal/mol).

|                    | Bond type                                          | $BDE_{exp.}$ | $BDE_{calc.}$ |
|--------------------|----------------------------------------------------|--------------|---------------|
| BDE <sub>C-H</sub> | CHF <sub>3</sub>                                   | 106.4        | 103.9         |
|                    | CH <sub>2</sub> F <sub>2</sub>                     | 103.2        | 99.1          |
|                    | CH <sub>3</sub> F                                  | 101.3        | 99.1          |
|                    | CHCl <sub>3</sub>                                  | 93.8         | 90.9          |
|                    | CH <sub>2</sub> Cl <sub>2</sub>                    | 95.7         | 93.8          |
|                    | CH <sub>3</sub> Cl                                 | 100.1        | 97.5          |
|                    | CHBr <sub>3</sub>                                  | 95.4         | 91.0          |
|                    | CH <sub>2</sub> Br <sub>2</sub>                    | 98.6         | 95.2          |
|                    | CH <sub>3</sub> Br                                 | 102.1        | 98.9          |
|                    | CHI <sub>3</sub>                                   | 101.1        | 93.0          |
|                    | CH <sub>2</sub> I <sub>2</sub>                     | 103.0        | 97.6          |
|                    | CH <sub>3</sub> I                                  | 103.5        | 100.9         |
|                    | C <sub>2</sub> H <sub>5</sub> Br (H <sub>b</sub> ) | 99.2         | 96.3          |
|                    | C <sub>2</sub> H <sub>5</sub> Cl (H <sub>a</sub> ) | 97.2         | 95.0          |

|                    |                                                    |       |       |
|--------------------|----------------------------------------------------|-------|-------|
|                    | C <sub>2</sub> H <sub>5</sub> Cl (H <sub>b</sub> ) | 101.1 | 98.8  |
|                    | C <sub>2</sub> H <sub>5</sub> F (H <sub>a</sub> )  | 98.2  | 96.6  |
|                    | C <sub>2</sub> H <sub>5</sub> F (H <sub>b</sub> )  | 103.6 | 101.3 |
|                    | C <sub>7</sub> H <sub>7</sub> Cl (H <sub>a</sub> ) | 84.2  | 84.2  |
|                    | CNCH <sub>2</sub> F                                | 88.6  | 88.6  |
| BDE <sub>C-X</sub> | CHF <sub>3</sub>                                   | 127.6 | 123.0 |
|                    | CH <sub>2</sub> F <sub>2</sub>                     | 118.6 | 116.7 |
|                    | CH <sub>3</sub> F                                  | 110.0 | 109.2 |
|                    | CHCl <sub>3</sub>                                  | 74.4  | 70.7  |
|                    | CH <sub>2</sub> Cl <sub>2</sub>                    | 80.8  | 76.1  |
|                    | CH <sub>3</sub> Cl                                 | 83.7  | 81.5  |
|                    | CHBr <sub>3</sub>                                  | 65.7  | 59.2  |
|                    | CH <sub>2</sub> Br <sub>2</sub>                    | 66.0  | 65.2  |
|                    | CH <sub>3</sub> Br                                 | 70.3  | 70.6  |
|                    | CHI <sub>3</sub>                                   | 52.7  | 48.1  |
|                    | CH <sub>2</sub> I <sub>2</sub>                     | 51.8  | 53.5  |
|                    | CH <sub>3</sub> I                                  | 56.9  | 58.3  |
|                    | C <sub>10</sub> H <sub>15</sub> Br                 | 70.8  | 74.8  |
|                    | C <sub>10</sub> H <sub>15</sub> Cl                 | 90.4  | 86.9  |
|                    | C <sub>2</sub> H <sub>5</sub> F                    | 111.7 | 111.0 |
|                    | C <sub>2</sub> H <sub>5</sub> Cl                   | 84.2  | 81.7  |
|                    | C <sub>2</sub> H <sub>5</sub> Br                   | 69.6  | 70.3  |
|                    | C <sub>2</sub> H <sub>5</sub> I                    | 56.3  | 57.8  |
|                    | C <sub>3</sub> H <sub>7</sub> F                    | 110.1 | 112.2 |
|                    | C <sub>3</sub> H <sub>7</sub> Cl                   | 84.6  | 81.3  |
|                    | C <sub>3</sub> H <sub>7</sub> Br                   | 70.5  | 69.4  |
|                    | C <sub>3</sub> H <sub>7</sub> I                    | 55.7  | 56.8  |
|                    | C <sub>5</sub> H <sub>4</sub> NCl                  | 90.5  | 90.7  |
|                    | C <sub>5</sub> H <sub>4</sub> NI                   | 66.6  | 68.7  |
|                    | C <sub>5</sub> H <sub>9</sub> Cl                   | 82.4  | 79.8  |
|                    | C <sub>5</sub> H <sub>9</sub> Br                   | 69.8  | 68.1  |
|                    | C <sub>5</sub> H <sub>9</sub> I                    | 55.4  | 55.8  |
|                    | C <sub>6</sub> H <sub>11</sub> F                   | 117.5 | 112.8 |
|                    | C <sub>6</sub> H <sub>11</sub> Cl                  | 86.1  | 82.7  |
|                    | C <sub>6</sub> H <sub>11</sub> Br                  | 69.9  | 70.8  |
|                    | C <sub>6</sub> H <sub>11</sub> I                   | 55.5  | 58.4  |
|                    | C <sub>6</sub> H <sub>5</sub> F                    | 127.2 | 125.8 |
|                    | C <sub>6</sub> H <sub>5</sub> Cl                   | 97.1  | 95.0  |
|                    | C <sub>6</sub> H <sub>5</sub> Br                   | 80.4  | 82.1  |
|                    | C <sub>6</sub> H <sub>5</sub> I                    | 67.4  | 68.9  |
|                    | C <sub>7</sub> H <sub>7</sub> F                    | 98.7  | 96.9  |
|                    | C <sub>7</sub> H <sub>7</sub> Cl                   | 71.7  | 68.9  |
|                    | C <sub>7</sub> H <sub>7</sub> Br                   | 57.2  | 58.1  |

|                                      |       |       |
|--------------------------------------|-------|-------|
| C <sub>7</sub> H <sub>7</sub> I      | 44.9  | 46.9  |
| CH <sub>3</sub> COF                  | 122.3 | 119.3 |
| CH <sub>3</sub> COCl                 | 84.6  | 82.3  |
| CH <sub>3</sub> COBr                 | 69.8  | 70.2  |
| CH <sub>3</sub> COI                  | 53.3  | 56.7  |
| CNCH <sub>2</sub> Cl                 | 66.4  | 66.8  |
| CNCH <sub>2</sub> Br                 | 56.8  | 56.3  |
| CNCH <sub>2</sub> I                  | 44.7  | 45.2  |
| SC <sub>2</sub> H <sub>5</sub> Cl    | 72    | 73.4  |
| SC <sub>2</sub> H <sub>5</sub> I     | 51.8  | 50.8  |
| CH <sub>3</sub> COCH <sub>2</sub> Br | 62.5  | 60.0  |
| C <sub>6</sub> H <sub>6</sub> NCl    | 69.9  | 69.1  |
| C <sub>4</sub> H <sub>9</sub> Cl     | 84.1  | 80.5  |
| C <sub>4</sub> H <sub>9</sub> Br     | 70    | 68.3  |
| C <sub>4</sub> H <sub>9</sub> I      | 53.4  | 55.6  |
| Mean absolute error                  | /     | 2.3   |

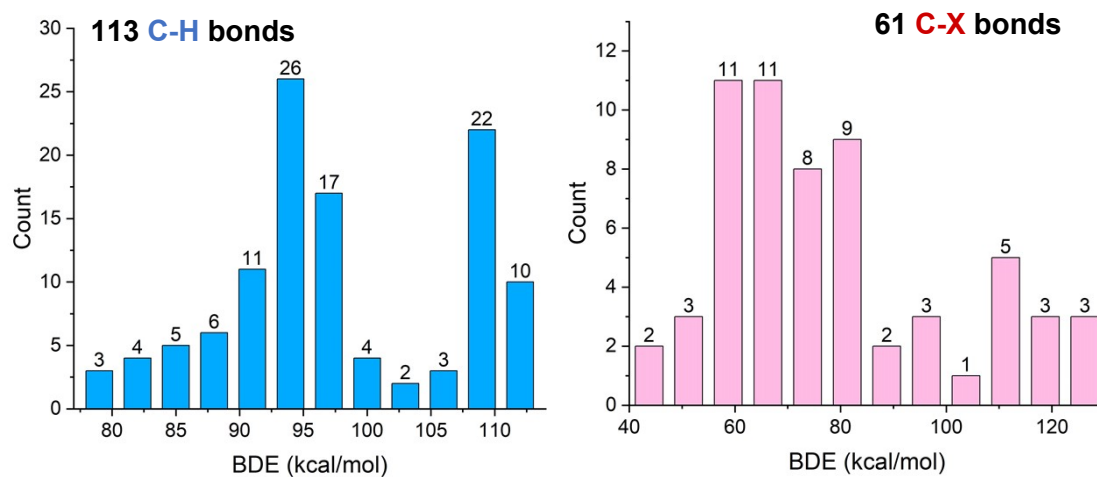

**Figure S3.** Distribution of calculated *BDEs*(kcal/mol).

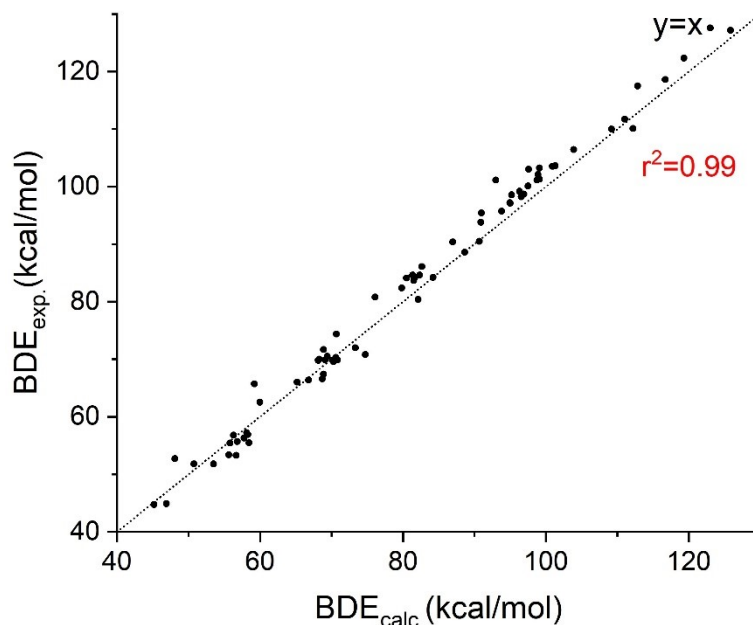

Figure S4. Correlations between the  $BDE_{\text{calc.}}$  with  $BDE_{\text{exp.}}$  (kcal/mol).

### 1.3 Calculated $BDE$ and $BO$

Table S2. The calculated  $BDE_{\text{C-H}}$  and  $BO_{\text{C-H}}$ .

| Bond type                                            | BDE      | BO     | Bond type                                           | BDE      | BO     | Bond type                                              | BDE      | BO     |
|------------------------------------------------------|----------|--------|-----------------------------------------------------|----------|--------|--------------------------------------------------------|----------|--------|
| C <sub>10</sub> H <sub>15</sub> Br (H <sub>b</sub> ) | 99.178   | 0.923  | C <sub>5</sub> H <sub>9</sub> Cl (H <sub>c</sub> )  | 94.0807  | 0.9342 | C <sub>7</sub> H <sub>7</sub> Cl (H <sub>c</sub> )     | 111.8924 | 0.9261 |
| C <sub>10</sub> H <sub>15</sub> Br (H <sub>c</sub> ) | 97.3249  | 0.9142 | C <sub>5</sub> H <sub>9</sub> I (H <sub>a</sub> )   | 94.085   | 0.9218 | C <sub>7</sub> H <sub>7</sub> Cl (H <sub>d</sub> )     | 111.5944 | 0.9277 |
| C <sub>10</sub> H <sub>15</sub> Br (H <sub>d</sub> ) | 97.9949  | 0.9305 | C <sub>5</sub> H <sub>9</sub> I (H <sub>b</sub> )   | 79.258   | 0.9098 | C <sub>7</sub> H <sub>7</sub> Cl (H <sub>e</sub> )     | 111.7443 | 0.9277 |
| C <sub>10</sub> H <sub>15</sub> Cl (H <sub>b</sub> ) | 99.1365  | 0.9242 | C <sub>5</sub> H <sub>9</sub> I (H <sub>c</sub> )   | 94.251   | 0.9332 | C <sub>7</sub> H <sub>7</sub> F (H <sub>a</sub> )      | 84.3371  | 0.9404 |
| C <sub>10</sub> H <sub>15</sub> Cl (H <sub>c</sub> ) | 97.4937  | 0.9146 | C <sub>6</sub> H <sub>11</sub> Br (H <sub>a</sub> ) | 94.4278  | 0.9125 | C <sub>7</sub> H <sub>7</sub> F (H <sub>c</sub> )      | 111.7713 | 0.9262 |
| C <sub>10</sub> H <sub>15</sub> Cl (H <sub>d</sub> ) | 98.0437  | 0.9305 | C <sub>6</sub> H <sub>11</sub> Br (H <sub>b</sub> ) | 97.2602  | 0.9222 | C <sub>7</sub> H <sub>7</sub> F (H <sub>d</sub> )      | 111.5955 | 0.9277 |
| C <sub>2</sub> H <sub>5</sub> Br (H <sub>a</sub> )   | 96.1901  | 0.9313 | C <sub>6</sub> H <sub>11</sub> Br (H <sub>c</sub> ) | 96.1702  | 0.9291 | C <sub>7</sub> H <sub>7</sub> F (H <sub>e</sub> )      | 111.6252 | 0.9278 |
| C <sub>2</sub> H <sub>5</sub> Br (H <sub>b</sub> )   | 96.2736  | 0.9255 | C <sub>6</sub> H <sub>11</sub> Br (H <sub>d</sub> ) | 96.3728  | 0.9286 | C <sub>7</sub> H <sub>7</sub> I (H <sub>a</sub> )      | 88.549   | 0.9296 |
| C <sub>2</sub> H <sub>5</sub> Cl (H <sub>a</sub> )   | 94.975   | 0.9293 | C <sub>6</sub> H <sub>11</sub> Cl (H <sub>a</sub> ) | 93.5252  | 0.9108 | C <sub>7</sub> H <sub>7</sub> I (H <sub>c</sub> )      | 111.950  | 0.9265 |
| C <sub>2</sub> H <sub>5</sub> Cl (H <sub>b</sub> )   | 98.7753  | 0.9298 | C <sub>6</sub> H <sub>11</sub> Cl (H <sub>b</sub> ) | 97.5474  | 0.9229 | C <sub>7</sub> H <sub>7</sub> I (H <sub>d</sub> )      | 111.613  | 0.9276 |
| C <sub>2</sub> H <sub>5</sub> F (H <sub>a</sub> )    | 96.5698  | 0.9424 | C <sub>6</sub> H <sub>11</sub> Cl (H <sub>c</sub> ) | 96.1785  | 0.929  | C <sub>7</sub> H <sub>7</sub> I (H <sub>e</sub> )      | 111.822  | 0.9278 |
| C <sub>2</sub> H <sub>5</sub> F (H <sub>b</sub> )    | 101.3099 | 0.9371 | C <sub>6</sub> H <sub>11</sub> Cl (H <sub>d</sub> ) | 96.3937  | 0.9287 | CH <sub>2</sub> Br <sub>2</sub>                        | 95.2     | 0.9252 |
| C <sub>2</sub> H <sub>5</sub> I (H <sub>a</sub> )    | 97.78    | 0.9337 | C <sub>6</sub> H <sub>11</sub> I (H <sub>a</sub> )  | 95.650   | 0.9158 | CH <sub>2</sub> Cl <sub>2</sub>                        | 93.8     | 0.9201 |
| C <sub>2</sub> H <sub>5</sub> I (H <sub>b</sub> )    | 87.4308  | 0.9229 | C <sub>6</sub> H <sub>11</sub> I (H <sub>b</sub> )  | 80.73    | 0.9222 | CH <sub>2</sub> F <sub>2</sub>                         | 99.1     | 0.9452 |
| C <sub>3</sub> H <sub>7</sub> Br (H <sub>a</sub> )   | 94.1239  | 0.9158 | C <sub>6</sub> H <sub>11</sub> I (H <sub>c</sub> )  | 96.118   | 0.9286 | CH <sub>2</sub> I <sub>2</sub>                         | 97.6     | 0.9313 |
| C <sub>3</sub> H <sub>7</sub> Br (H <sub>b</sub> )   | 96.1178  | 0.9254 | C <sub>6</sub> H <sub>11</sub> I (H <sub>d</sub> )  | 96.366   | 0.9286 | CH <sub>3</sub> Br                                     | 98.9     | 0.9437 |
| C <sub>3</sub> H <sub>7</sub> Cl (H <sub>a</sub> )   | 93.1873  | 0.9139 | C <sub>6</sub> H <sub>5</sub> Br (H <sub>b</sub> )  | 112.5727 | 0.9193 | CH <sub>3</sub> Cl                                     | 97.5     | 0.9414 |
| C <sub>3</sub> H <sub>7</sub> Cl (H <sub>b</sub> )   | 98.7035  | 0.9298 | C <sub>6</sub> H <sub>5</sub> Br (H <sub>c</sub> )  | 111.3946 | 0.9264 | CH <sub>3</sub> COBr                                   | 101.9148 | 0.9113 |
| C <sub>3</sub> H <sub>7</sub> F (H <sub>a</sub> )    | 94.6661  | 0.9259 | C <sub>6</sub> H <sub>5</sub> Br (H <sub>d</sub> )  | 112.2021 | 0.9268 | CH <sub>3</sub> COCH <sub>2</sub> Br (H <sub>a</sub> ) | 87.2073  | 0.9092 |
| C <sub>3</sub> H <sub>7</sub> F (H <sub>b</sub> )    | 101.2961 | 0.9378 | C <sub>6</sub> H <sub>5</sub> Cl (H <sub>b</sub> )  | 113.1296 | 0.92   | CH <sub>3</sub> COCH <sub>2</sub> Br (H <sub>c</sub> ) | 94.4225  | 0.9323 |
| C <sub>3</sub> H <sub>7</sub> I (H <sub>a</sub> )    | 95.419   | 0.9189 | C <sub>6</sub> H <sub>5</sub> Cl (H <sub>c</sub> )  | 111.5567 | 0.9266 | CH <sub>3</sub> COCl                                   | 95.3537  | 0.9125 |
| C <sub>3</sub> H <sub>7</sub> I (H <sub>b</sub> )    | 83.83    | 0.9221 | C <sub>6</sub> H <sub>5</sub> Cl (H <sub>d</sub> )  | 112.2784 | 0.927  | CH <sub>3</sub> COF                                    | 96.0657  | 0.9161 |
| C <sub>4</sub> H <sub>9</sub> Br (H <sub>b</sub> )   | 90.3217  | 0.9232 | C <sub>6</sub> H <sub>5</sub> F (H <sub>b</sub> )   | 114.0035 | 0.92   | CH <sub>3</sub> COI                                    | 94.956   | 0.9104 |
| C <sub>4</sub> H <sub>9</sub> Cl (H <sub>b</sub> )   | 98.6455  | 0.9281 | C <sub>6</sub> H <sub>5</sub> F (H <sub>c</sub> )   | 111.687  | 0.9276 | CH <sub>3</sub> F                                      | 99.1     | 0.9564 |

|                                                     |          |        |                                                     |          |        |                                                     |         |        |
|-----------------------------------------------------|----------|--------|-----------------------------------------------------|----------|--------|-----------------------------------------------------|---------|--------|
| C <sub>4</sub> H <sub>9</sub> I (H <sub>b</sub> )   | 81.26    | 0.9198 | C <sub>6</sub> H <sub>5</sub> F (H <sub>d</sub> )   | 112.5339 | 0.9269 | CH <sub>3</sub> I                                   | 100.9   | 0.9462 |
| C <sub>5</sub> H <sub>4</sub> NCl (H <sub>a</sub> ) | 111.1449 | 0.9252 | C <sub>6</sub> H <sub>5</sub> I (H <sub>b</sub> )   | 111.79   | 0.9194 | CHBr <sub>3</sub>                                   | 91      | 0.9063 |
| C <sub>5</sub> H <sub>4</sub> NCl (H <sub>b</sub> ) | 113.1372 | 0.9238 | C <sub>6</sub> H <sub>5</sub> I (H <sub>c</sub> )   | 111.273  | 0.9258 | CHCl <sub>3</sub>                                   | 90.9    | 0.8966 |
| C <sub>5</sub> H <sub>4</sub> NCl (H <sub>c</sub> ) | 106.6584 | 0.9238 | C <sub>6</sub> H <sub>5</sub> I (H <sub>d</sub> )   | 112.110  | 0.9268 | CHF <sub>3</sub>                                    | 103.9   | 0.9306 |
| C <sub>5</sub> H <sub>4</sub> NCl (H <sub>d</sub> ) | 113.097  | 1.0471 | C <sub>6</sub> H <sub>6</sub> NCl (H <sub>a</sub> ) | 84.296   | 0.9226 | CHI <sub>3</sub>                                    | 93      | 0.9216 |
| C <sub>5</sub> H <sub>4</sub> NI (H <sub>a</sub> )  | 106.541  | 0.9182 | C <sub>6</sub> H <sub>6</sub> NCl (H <sub>c</sub> ) | 111.9215 | 0.9212 | CNCH <sub>2</sub> Br                                | 87.8256 | 0.8966 |
| C <sub>5</sub> H <sub>4</sub> NI (H <sub>b</sub> )  | 111.082  | 0.923  | C <sub>6</sub> H <sub>6</sub> NCl (H <sub>d</sub> ) | 110.8864 | 0.9266 | CNCH <sub>2</sub> Cl                                | 86.6625 | 0.8946 |
| C <sub>5</sub> H <sub>4</sub> NI (H <sub>c</sub> )  | 111.5875 | 0.9229 | C <sub>6</sub> H <sub>6</sub> NCl (H <sub>e</sub> ) | 112.4097 | 0.9247 | CNCH <sub>2</sub> F                                 | 88.6433 | 0.9113 |
| C <sub>5</sub> H <sub>4</sub> NI (H <sub>d</sub> )  | 106.4375 | 1.0058 | C <sub>6</sub> H <sub>6</sub> NCl (H <sub>f</sub> ) | 105.9481 | 0.9242 | CNCH <sub>2</sub> I                                 | 89.407  | 0.8989 |
| C <sub>5</sub> H <sub>9</sub> Br (H <sub>a</sub> )  | 92.985   | 0.9183 | C <sub>7</sub> H <sub>7</sub> Br (H <sub>a</sub> )  | 86.1632  | 0.9163 | SC <sub>2</sub> H <sub>5</sub> Cl (H <sub>a</sub> ) | 92.1362 | 0.9178 |
| C <sub>5</sub> H <sub>9</sub> Br (H <sub>b</sub> )  | 88.0989  | 0.9131 | C <sub>7</sub> H <sub>7</sub> Br (H <sub>c</sub> )  | 111.9483 | 0.9143 | SC <sub>2</sub> H <sub>5</sub> Cl (H <sub>c</sub> ) | 93.3693 | 0.93   |
| C <sub>5</sub> H <sub>9</sub> Br (H <sub>c</sub> )  | 94.1498  | 0.9337 | C <sub>7</sub> H <sub>7</sub> Br (H <sub>d</sub> )  | 111.6049 | 0.928  | SC <sub>2</sub> H <sub>5</sub> I (H <sub>a</sub> )  | 94.619  | 0.9224 |
| C <sub>5</sub> H <sub>9</sub> Cl (H <sub>a</sub> )  | 92.0736  | 0.9168 | C <sub>7</sub> H <sub>7</sub> Br (H <sub>e</sub> )  | 111.7808 | 0.9278 | SC <sub>2</sub> H <sub>5</sub> I (H <sub>c</sub> )  | 93.145  | 0.9264 |
| C <sub>5</sub> H <sub>9</sub> Cl (H <sub>b</sub> )  | 91.9867  | 0.9175 | C <sub>7</sub> H <sub>7</sub> Cl (H <sub>a</sub> )  | 84.2431  | 0.9258 |                                                     |         |        |

**Table S3.** The calculated  $BDE_{C-X}$  and  $BO_{C-X}$ .

| Bond type                          | BDE         | BO     | Bond type                            | BDE         | BO     | Bond type                         | BDE         | BO     |
|------------------------------------|-------------|--------|--------------------------------------|-------------|--------|-----------------------------------|-------------|--------|
| C <sub>10</sub> H <sub>15</sub> F  | 118.106073  | 0.7914 | C <sub>6</sub> H <sub>5</sub> Cl     | 94.99364313 | 1.056  | SC <sub>2</sub> H <sub>5</sub> Br | 62.585915   | 0.946  |
| C <sub>2</sub> H <sub>5</sub> F    | 111.0421986 | 0.826  | C <sub>6</sub> H <sub>6</sub> NCl    | 69.13774169 | 0.9827 | CHBr <sub>3</sub>                 | 59.2        | 1.0145 |
| C <sub>3</sub> H <sub>7</sub> F    | 112.2049737 | 0.8025 | C <sub>7</sub> H <sub>7</sub> Cl     | 68.88171782 | 0.9701 | CH <sub>2</sub> Br <sub>2</sub>   | 65.2        | 1.0259 |
| C <sub>5</sub> H <sub>4</sub> NF   | 124.9703995 | 0.8731 | CH <sub>3</sub> COCl                 | 82.33426648 | 0.954  | CH <sub>3</sub> Br                | 70.6        | 1.0235 |
| C <sub>5</sub> H <sub>9</sub> F    | 110.2854221 | 0.7992 | CNCH <sub>2</sub> Cl                 | 66.79650375 | 1.0045 | C <sub>10</sub> H <sub>15</sub> I | 62.939      | 0.9305 |
| C <sub>6</sub> H <sub>11</sub> F   | 112.8306007 | 0.8078 | SC <sub>2</sub> H <sub>5</sub> Cl    | 73.35711557 | 0.9714 | C <sub>2</sub> H <sub>5</sub> I   | 57.77856472 | 0.9828 |
| C <sub>6</sub> H <sub>5</sub> F    | 125.8432652 | 0.8746 | CHCl <sub>3</sub>                    | 70.7        | 1.035  | C <sub>3</sub> H <sub>7</sub> I   | 56.8322804  | 0.9482 |
| C <sub>7</sub> H <sub>7</sub> F    | 96.94519767 | 0.8125 | CH <sub>2</sub> Cl <sub>2</sub>      | 76.1        | 1.0373 | C <sub>4</sub> H <sub>9</sub> I   | 55.6368748  | 0.9117 |
| CH <sub>3</sub> COF                | 119.3416392 | 0.8287 | CH <sub>3</sub> Cl                   | 81.5        | 1.0268 | C <sub>5</sub> H <sub>4</sub> NI  | 68.69974006 | 1.0058 |
| CNCH <sub>2</sub> F                | 95.09027959 | 0.8549 | C <sub>10</sub> H <sub>15</sub> Br   | 74.7658744  | 0.9466 | C <sub>5</sub> H <sub>9</sub> I   | 55.81634252 | 0.9437 |
| SC <sub>2</sub> H <sub>5</sub> F   | 102.8230792 | 0.8169 | C <sub>2</sub> H <sub>5</sub> Br     | 70.28733909 | 0.9939 | C <sub>6</sub> H <sub>11</sub> I  | 58.44999989 | 0.9549 |
| CHF <sub>3</sub>                   | 123         | 0.8919 | C <sub>3</sub> H <sub>7</sub> Br     | 69.40380572 | 0.96   | C <sub>6</sub> H <sub>5</sub> I   | 68.88171781 | 1.0091 |
| CH <sub>2</sub> F <sub>2</sub>     | 116.7       | 0.8711 | C <sub>4</sub> H <sub>9</sub> Br     | 68.25169828 | 0.927  | C <sub>7</sub> H <sub>7</sub> I   | 46.91574777 | 0.9371 |
| CH <sub>3</sub> F                  | 109.2       | 0.8488 | C <sub>5</sub> H <sub>4</sub> NBr    | 77.52628869 | 1.0325 | CH <sub>3</sub> COI               | 56.67226547 | 0.892  |
| C <sub>10</sub> H <sub>15</sub> Cl | 86.94834383 | 0.9588 | C <sub>5</sub> H <sub>9</sub> Br     | 68.13937408 | 0.9559 | CNCH <sub>2</sub> I               | 45.16374124 | 0.9489 |
| C <sub>2</sub> H <sub>5</sub> Cl   | 81.68542165 | 0.9998 | C <sub>6</sub> H <sub>11</sub> Br    | 70.83766493 | 0.9683 | SC <sub>2</sub> H <sub>5</sub> I  | 50.75171334 | 0.9195 |
| C <sub>3</sub> H <sub>7</sub> Cl   | 81.34154645 | 0.9695 | C <sub>6</sub> H <sub>5</sub> Br     | 82.10961808 | 1.0441 | CHI <sub>3</sub>                  | 48.1        | 0.9694 |
| C <sub>4</sub> H <sub>9</sub> Cl   | 80.50821383 | 0.9411 | C <sub>7</sub> H <sub>7</sub> Br     | 58.11992989 | 1.0111 | CH <sub>2</sub> I <sub>2</sub>    | 53.5        | 0.997  |
| C <sub>5</sub> H <sub>4</sub> NCl  | 90.68139784 | 1.0471 | CH <sub>3</sub> COBr                 | 70.16685727 | 0.9272 | CH <sub>3</sub> I                 | 58.3        | 1.0115 |
| C <sub>5</sub> H <sub>9</sub> Cl   | 79.84932886 | 0.9649 | CH <sub>3</sub> COCH <sub>2</sub> Br | 59.9836331  | 1.0223 |                                   |             |        |
| C <sub>6</sub> H <sub>11</sub> Cl  | 82.66182643 | 0.9759 | CNCH <sub>2</sub> Br                 | 56.30893747 | 0.9844 |                                   |             |        |

## 2. Details of machine learning

### 2.1 Generation of transition states geometries and corresponding barriers

The workflow for DFT data generation is detailed in Figure S5. Initially, the organic halides

and radicals were optimized to obtain the equilibrium structures and ground-state energies of the reactants. The optimized geometries served as the basis for constructing initial transition state (TS) guesses. Specifically, Python scripts were employed to automatically assemble fragments of the organic halides and radicals into starting TS geometries for each target reaction. These guesses were then subjected to TS optimization. To ensure the localization of the correct HAT and XAT transition states, all output files were automatically validated; instances of optimization failure were rectified through manual adjustment of the guess geometries. Subsequent single-point energy calculations were performed on all verified TS structures. The automation scripts for geometry generation and output verification are hosted on our GitHub repository (<https://github.com/liusqchem/machine-learning.git>). The H/X selectivity of the carbon radicals is quantified by the relative activation barrier  $\Delta\Delta G^\ddagger$ , defined as the difference between the lowest-lying HAT and XAT transition states ( $\Delta G^\ddagger_H - \Delta G^\ddagger_X$ ) for each organic halide substrate.

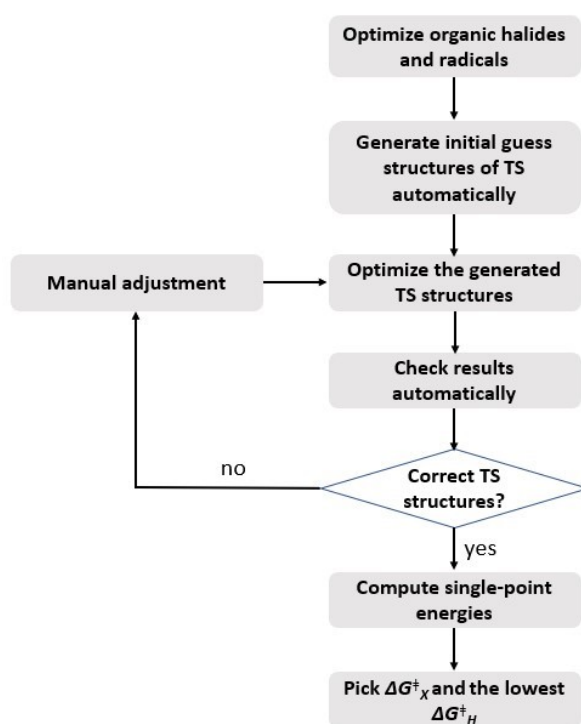

**Figure S5.** Flow chart of the DFT-computed data generation

## 2.2 Details and calculations of descriptors

We initially select 18 physical organic descriptors categorized into eight groups: frontier molecular orbital (*FMO*) energies, atom charges, Wiberg bond orders (*BO*), bond dissociation energies (*BDE*), reaction free energies ( $\Delta G$ ), spin densities, ionization potentials (*IP*) and electrostatic potentials (*ESP*). These descriptors were strategically chosen to capture both the thermodynamic and polar effects governing atom transfer reactions. Thermodynamic effects are represented by three categories comprising eight descriptors: the *BDE*s of the breaking and forming C-H/C-X bonds (4 descriptors), the Wiberg bond orders of the scissile C-H and C-X bonds (2 descriptors), and reaction energies for the HAT ( $\Delta G_H$ ) and XAT ( $\Delta G_X$ ) pathways (2 descriptors). Polar effects are encoded by the remaining ten descriptors across five categories: the spin density of carbon radical center ( $C_1$ ), Natural Population Analysis (NPA) charges (encompassing the radical ( $C_1$ ), the abstracted H/X atoms, and their adjacent carbon atom ( $C_2$ ,  $C_3$ ); 5 descriptors), *FMO*

energies of the carbon radicals (E(LUMO) and E(SOMO) (i.e. E(HOMO)); 2 descriptors), and the *ESP* and *IP* of the carbon radicals (1 descriptor each).

### 2.2.1 Bond dissociation energy (*BDE*) and bond order (*BO*)

Tables S2 and S3 provide comprehensive computational details for the bond dissociation energies (*BDE*) of the scissile and nascent C–H/C–X bonds in both reactants and products.  $BDE_{C-H}$  and  $BDE_{C-X}$  were calculated as:

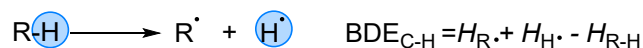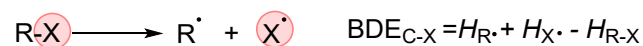

Additionally, bond order descriptors were derived from Wiberg bond indexes<sup>13</sup>. Our analysis explicitly incorporates the  $BO_{C-H}$  and  $BO_{C-X}$  values for each potential reacting carbon center.

### 2.2.2 Frontier orbital energy and ionization potentials

Table S4 includes the calculation details of the **FMO** energy-based descriptors. The SOMO(HOMO) and LUMO energies for radicals were obtained from single-point energy calculation. The calculated gas-phase ionization potentials (eV) were computed as indicated in Eq. (1), -0.03766 eV is the energy value of a free electron at 298K.

$$IP \text{ (eV)} = (H_{\text{radical cation}} - H_{\text{radical}}) - 0.03766 \quad \text{Eq. (1)}$$

### 2.2.3 Spin, atomic charge and electrostatic potentials

Natural bond orbital (*NBO*) analysis was conducted to obtain the atomic charge information. Charge ( $C_1$ ) in Table S4 refers to the NPA charge<sup>14</sup> of radical-center carbon atom. Charge (H), charge ( $C_2$ ), charge(X) and charge( $C_3$ ) in Table S5 refer to the NPA charge of abstracted H atom, the adjacent carbon atom( $C_2$ ), abstracted halogen atom and adjacent carbon atom( $C_3$ ). Spin ( $C_1$ ) in Table S4 refers to Mulliken atomic spin population<sup>15</sup> of radical-center atom. Electrostatic potentials(*ESP*) of radicals in Table S4 are calculated using Multiwfn<sup>16</sup>.

### 2.2.4 Database for descriptors

**Table S4.** Phys-org descriptors for radicals.

| Radical | Spin ( $C_1$ ) | Charge ( $C_1$ ) | IP  | E(SOMO)  | E(LUMO)  | ESP     |
|---------|----------------|------------------|-----|----------|----------|---------|
| 1       | 1.083          | -0.468           | 9.8 | -0.23781 | -0.08075 | 3.19233 |
| 2       | 1.057          | -0.272           | 8.1 | -0.20781 | -0.06085 | 2.55279 |
| 3       | 1.013          | -0.089           | 7.3 | -0.18834 | -0.04861 | 2.28046 |
| 4       | 1.04           | -0.077           | 7.1 | -0.18846 | -0.05038 | 2.1719  |
| 5       | 0.967          | 0.071            | 6.7 | -0.17686 | -0.0426  | 2.77247 |
| 6       | 0.883          | -0.253           | 6.3 | -0.15677 | -0.0285  | 4.3306  |
| 7       | 0.905          | -0.032           | 5.1 | -0.13958 | -0.03085 | 2.61164 |
| 8       | 0.859          | -0.032           | 4.9 | -0.13397 | -0.02748 | 3.04769 |
| 9       | 0.894          | -0.045           | 4.7 | -0.12858 | -0.01797 | 1.50218 |
| 10      | 0.845          | -0.247           | 5.6 | -0.1504  | -0.05433 | 3.4703  |
| 11      | 0.88           | -0.21            | 6.8 | -0.18295 | -0.07161 | 3.66203 |
| 12      | 0.857          | 0.148            | 5.2 | -0.14351 | -0.02473 | 3.5872  |
| 13      | 0.931          | -0.061           | 7.6 | -0.18726 | -0.04559 | 4.45321 |
| 14      | 0.924          | -0.063           | 7.0 | -0.18146 | -0.04818 | 3.90981 |
| 15      | 0.916          | 0.317            | 6.1 | -0.16612 | -0.03462 | 3.85535 |

|    |       |        |     |          |          |          |
|----|-------|--------|-----|----------|----------|----------|
| 16 | 0.875 | 0.388  | 5.6 | -0.17078 | -0.0413  | 3.18867  |
| 17 | 0.882 | -0.239 | 8.3 | -0.27007 | -0.13799 | 3.75155  |
| 18 | 0.947 | -0.253 | 8.4 | -0.26757 | -0.13399 | 3.96379  |
| 19 | 0.964 | -0.267 | 8.4 | -0.24525 | -0.11988 | 3.69976  |
| 20 | 0.773 | 0.093  | 7.6 | -0.2268  | -0.11256 | 2.74079  |
| 21 | 0.664 | 0.168  | 7.9 | -0.22052 | -0.10516 | 4.26836  |
| 22 | 0.747 | -0.129 | 9.6 | -0.2924  | -0.19318 | 4.62418  |
| 23 | 0.688 | -0.31  | 8.0 | -0.20653 | -0.09018 | 3.86071  |
| 24 | 0.798 | -0.351 | 8.6 | -0.2233  | -0.10521 | 3.78623  |
| 25 | 0.797 | -0.284 | 7.1 | -0.19203 | -0.09497 | 3.79475  |
| 26 | 0.759 | -0.259 | 7.6 | -0.2173  | -0.12716 | 3.79665  |
| 27 | 0.797 | -0.312 | 6.3 | -0.17423 | -0.08229 | 3.8505   |
| 28 | 0.647 | 0.187  | 6.3 | -0.1658  | -0.07376 | 4.50266  |
| 29 | 0.633 | 0.256  | 6.8 | -0.19375 | -0.10072 | 3.74628  |
| 30 | 0.625 | 0.371  | 5.7 | -0.15627 | -0.06814 | 3.42916  |
| 31 | 0.597 | 0.361  | 6.0 | -0.15868 | -0.06929 | 3.61018  |
| 32 | 0.652 | -0.11  | 6.3 | -0.17965 | -0.10143 | 4.1306   |
| 33 | 0.629 | -0.077 | 6.8 | -0.19498 | -0.11999 | 4.70461  |
| 34 | 0.543 | 0.022  | 5.3 | -0.14707 | -0.07331 | 3.08519  |
| 35 | 1.055 | -0.054 | 8.5 | -0.23292 | -0.07954 | 14.11783 |
| 36 | 1.061 | 0.17   | 8.1 | -0.25035 | -0.09384 | 15.87553 |
| 37 | 1.124 | 0.463  | 9.0 | -0.25046 | -0.13057 | 17.81607 |
| 38 | 0.995 | 0.315  | 7.7 | -0.22646 | -0.08468 | 16.51412 |
| 39 | 1.057 | -0.068 | 5.1 | -0.12162 | -0.02123 | 3.35522  |
| 40 | 0.409 | 0.036  | 5.2 | -0.14153 | -0.07161 | 3.06249  |
| 41 | 0.937 | -0.292 | 8.7 | -0.25475 | -0.09153 | 13.91240 |
| 42 | 0.633 | -0.521 | 7.9 | -0.22309 | -0.12405 | 14.48714 |
| 43 | 0.998 | 1.263  | 6.1 | -0.18505 | -0.07384 | 9.48910  |
| 44 | 0.917 | 0.82   | 6.6 | -0.19973 | -0.10169 | 10.83672 |
| 45 | 0.918 | -0.095 | 6.1 | -0.18941 | -0.09742 | 6.48321  |
| 46 | 0.894 | 0.713  | 5.5 | -0.17703 | -0.08298 | 8.47136  |
| 47 | 0.981 | 0.108  | 6.5 | -0.24607 | -0.15358 | 31.09472 |
| 48 | 0.705 | -0.135 | 9.3 | -0.25454 | -0.15118 | 40.49280 |
| 49 | 0.646 | -0.184 | 8.6 | -0.23816 | -0.13939 | 38.27280 |
| 50 | 0.566 | -0.203 | 7.8 | -0.22791 | -0.14265 | 34.90718 |

**Table S5.** Charge for organic halides.

| Atom position                                        | C <sub>2</sub> (C <sub>3</sub> ) | H(X)   | Atom position                                       | C <sub>2</sub> (C <sub>3</sub> ) | H(X)  | Atom position                                     | C <sub>2</sub> (C <sub>3</sub> ) | H(X)  |
|------------------------------------------------------|----------------------------------|--------|-----------------------------------------------------|----------------------------------|-------|---------------------------------------------------|----------------------------------|-------|
| C <sub>10</sub> H <sub>15</sub> Br (H <sub>b</sub> ) | -0.404                           | 0.209  | C <sub>5</sub> H <sub>9</sub> I (H <sub>a</sub> )   | -0.296                           | 0.209 | C <sub>7</sub> H <sub>7</sub> I (H <sub>a</sub> ) | -0.482                           | 0.216 |
| C <sub>10</sub> H <sub>15</sub> Br (H <sub>c</sub> ) | -0.218                           | 0.203  | C <sub>5</sub> H <sub>9</sub> I (H <sub>b</sub> )   | -0.41                            | 0.216 | C <sub>7</sub> H <sub>7</sub> I (H <sub>c</sub> ) | -0.182                           | 0.204 |
| C <sub>10</sub> H <sub>15</sub> Br (H <sub>d</sub> ) | -0.373                           | 0.198  | C <sub>5</sub> H <sub>9</sub> I (H <sub>c</sub> )   | -0.39                            | 0.204 | C <sub>7</sub> H <sub>7</sub> I (H <sub>d</sub> ) | -0.194                           | 0.205 |
| C <sub>10</sub> H <sub>15</sub> Br (Br)              | -0.04                            | -0.031 | C <sub>5</sub> H <sub>9</sub> I (I)                 | -0.296                           | 0.042 | C <sub>7</sub> H <sub>7</sub> I (H <sub>e</sub> ) | -0.194                           | 0.205 |
| C <sub>10</sub> H <sub>15</sub> Cl (H <sub>b</sub> ) | -0.399                           | 0.209  | C <sub>6</sub> H <sub>11</sub> Br (H <sub>a</sub> ) | -0.21                            | 0.195 | C <sub>7</sub> H <sub>7</sub> I (I)               | -0.482                           | 0.058 |

|                                                      |        |        |                                                     |        |        |                                                        |        |        |
|------------------------------------------------------|--------|--------|-----------------------------------------------------|--------|--------|--------------------------------------------------------|--------|--------|
| C <sub>10</sub> H <sub>15</sub> Cl (H <sub>c</sub> ) | -0.219 | 0.202  | C <sub>6</sub> H <sub>11</sub> Br (H <sub>b</sub> ) | -0.403 | 0.21   | CH <sub>2</sub> Br <sub>2</sub> (H)                    | -0.535 | 0.212  |
| C <sub>10</sub> H <sub>15</sub> Cl (H <sub>d</sub> ) | -0.372 | 0.198  | C <sub>6</sub> H <sub>11</sub> Br (H <sub>c</sub> ) | -0.375 | 0.186  | CH <sub>2</sub> Br <sub>2</sub> (Br)                   | -0.535 | 0.056  |
| C <sub>10</sub> H <sub>15</sub> Cl (Cl)              | 0.008  | -0.087 | C <sub>6</sub> H <sub>11</sub> Br (H <sub>d</sub> ) | -0.379 | 0.2    | CH <sub>2</sub> Cl <sub>2</sub> (H)                    | -0.38  | 0.205  |
| C <sub>2</sub> H <sub>5</sub> Br (H <sub>a</sub> )   | -0.396 | 0.199  | C <sub>6</sub> H <sub>11</sub> Br (Br)              | -0.21  | -0.033 | CH <sub>2</sub> Cl <sub>2</sub> (Cl)                   | -0.38  | -0.016 |
| C <sub>2</sub> H <sub>5</sub> Br (H <sub>b</sub> )   | -0.592 | 0.207  | C <sub>6</sub> H <sub>11</sub> Cl (H <sub>a</sub> ) | -0.151 | 0.19   | CH <sub>2</sub> F <sub>2</sub> (H)                     | 0.499  | 0.125  |
| C <sub>2</sub> H <sub>5</sub> Br (Br)                | -0.396 | -0.033 | C <sub>6</sub> H <sub>11</sub> Cl (H <sub>b</sub> ) | -0.399 | 0.198  | CH <sub>2</sub> F <sub>2</sub> (F)                     | 0.499  | -0.375 |
| C <sub>2</sub> H <sub>5</sub> Cl (H <sub>a</sub> )   | -0.331 | 0.195  | C <sub>6</sub> H <sub>11</sub> Cl (H <sub>c</sub> ) | -0.376 | 0.202  | CH <sub>2</sub> I <sub>2</sub> (H)                     | -0.771 | 0.214  |
| C <sub>2</sub> H <sub>5</sub> Cl (H <sub>b</sub> )   | -0.59  | 0.206  | C <sub>6</sub> H <sub>11</sub> Cl (H <sub>d</sub> ) | -0.378 | 0.187  | CH <sub>2</sub> I <sub>2</sub> (I)                     | -0.771 | 0.171  |
| C <sub>2</sub> H <sub>5</sub> Cl (Cl)                | -0.331 | -0.089 | C <sub>6</sub> H <sub>11</sub> Cl (Cl)              | -0.151 | -0.09  | CH <sub>3</sub> Br(H)                                  | -0.601 | 0.206  |
| C <sub>2</sub> H <sub>5</sub> F (H <sub>a</sub> )    | 0.1    | 0.151  | C <sub>6</sub> H <sub>11</sub> I (H <sub>a</sub> )  | -0.292 | 0.197  | CH <sub>3</sub> Br (Br)                                | -0.601 | -0.018 |
| C <sub>2</sub> H <sub>5</sub> F (H <sub>b</sub> )    | -0.611 | 0.205  | C <sub>6</sub> H <sub>11</sub> I (H <sub>b</sub> )  | -0.408 | 0.198  | CH <sub>3</sub> Cl(H)                                  | -0.527 | 0.201  |
| C <sub>2</sub> H <sub>5</sub> F (F)                  | 0.1    | -0.408 | C <sub>6</sub> H <sub>11</sub> I (H <sub>c</sub> )  | -0.374 | 0.203  | CH <sub>3</sub> Cl (Cl)                                | -0.527 | -0.076 |
| C <sub>2</sub> H <sub>5</sub> I (H <sub>a</sub> )    | -0.496 | 0.203  | C <sub>6</sub> H <sub>11</sub> I (H <sub>d</sub> )  | -0.38  | 0.187  | CH <sub>3</sub> COBr(H)                                | -0.675 | 0.229  |
| C <sub>2</sub> H <sub>5</sub> I (H <sub>b</sub> )    | -0.595 | 0.207  | C <sub>6</sub> H <sub>11</sub> I (I)                | -0.292 | 0.059  | CH <sub>3</sub> COBr (Br)                              | 0.527  | -0.071 |
| C <sub>2</sub> H <sub>5</sub> I (I)                  | -0.496 | 0.065  | C <sub>6</sub> H <sub>5</sub> Br (H <sub>b</sub> )  | -0.226 | 0.219  | CH <sub>3</sub> COCH <sub>2</sub> Br (H <sub>a</sub> ) | -0.525 | 0.228  |
| C <sub>3</sub> H <sub>7</sub> Br (H <sub>a</sub> )   | -0.219 | 0.195  | C <sub>6</sub> H <sub>5</sub> Br (H <sub>c</sub> )  | -0.185 | 0.207  | CH <sub>3</sub> COCH <sub>2</sub> Br (H <sub>c</sub> ) | -0.668 | 0.222  |
| C <sub>3</sub> H <sub>7</sub> Br (H <sub>b</sub> )   | -0.589 | 0.204  | C <sub>6</sub> H <sub>5</sub> Br (H <sub>d</sub> )  | -0.205 | 0.207  | CH <sub>3</sub> COCH <sub>2</sub> Br (Br)              | -0.525 | 0.033  |
| C <sub>3</sub> H <sub>7</sub> Br (Br)                | -0.219 | -0.046 | C <sub>6</sub> H <sub>5</sub> Br (Br)               | -0.106 | 0.073  | CH <sub>3</sub> COCl(H)                                | -0.674 | 0.229  |
| C <sub>3</sub> H <sub>7</sub> Cl (H <sub>a</sub> )   | -0.164 | 0.19   | C <sub>6</sub> H <sub>5</sub> Cl (H <sub>b</sub> )  | -0.226 | 0.219  | CH <sub>3</sub> COCl (Cl)                              | 0.569  | -0.104 |
| C <sub>3</sub> H <sub>7</sub> Cl (H <sub>b</sub> )   | -0.586 | 0.213  | C <sub>6</sub> H <sub>5</sub> Cl (H <sub>c</sub> )  | -0.185 | 0.207  | CH <sub>3</sub> COF(H)                                 | -0.697 | 0.237  |
| C <sub>3</sub> H <sub>7</sub> Cl (Cl)                | -0.164 | -0.098 | C <sub>6</sub> H <sub>5</sub> Cl (H <sub>d</sub> )  | -0.206 | 0.207  | CH <sub>3</sub> COF (F)                                | 0.908  | -0.382 |
| C <sub>3</sub> H <sub>7</sub> F (H <sub>a</sub> )    | 0.239  | 0.149  | C <sub>6</sub> H <sub>5</sub> Cl (Cl)               | -0.035 | 0.003  | CH <sub>3</sub> COI(H)                                 | -0.678 | 0.243  |
| C <sub>3</sub> H <sub>7</sub> F (H <sub>b</sub> )    | -0.602 | 0.204  | C <sub>6</sub> H <sub>5</sub> F (H <sub>b</sub> )   | -0.267 | 0.22   | CH <sub>3</sub> COI (I)                                | 0.471  | -0.014 |
| C <sub>3</sub> H <sub>7</sub> F (F)                  | 0.239  | -0.418 | C <sub>6</sub> H <sub>5</sub> F (H <sub>c</sub> )   | -0.183 | 0.206  | CH <sub>3</sub> F(H)                                   | -0.071 | 0.155  |
| C <sub>3</sub> H <sub>7</sub> I (H <sub>a</sub> )    | -0.304 | 0.196  | C <sub>6</sub> H <sub>5</sub> F (H <sub>d</sub> )   | -0.219 | 0.207  | CH <sub>3</sub> F (F)                                  | -0.071 | -0.394 |
| C <sub>3</sub> H <sub>7</sub> I (H <sub>b</sub> )    | -0.594 | 0.213  | C <sub>6</sub> H <sub>5</sub> F (F)                 | 0.417  | -0.358 | CH <sub>3</sub> I(H)                                   | -0.717 | 0.21   |
| C <sub>3</sub> H <sub>7</sub> I (I)                  | -0.304 | 0.048  | C <sub>6</sub> H <sub>5</sub> I (H <sub>b</sub> )   | -0.23  | 0.218  | CH <sub>3</sub> I (I)                                  | -0.717 | 0.089  |
| C <sub>4</sub> H <sub>9</sub> Br (H <sub>b</sub> )   | -0.591 | 0.213  | C <sub>6</sub> H <sub>5</sub> I (H <sub>c</sub> )   | -0.186 | 0.208  | CHBr <sub>3</sub> (H)                                  | -0.546 | 0.208  |
| C <sub>4</sub> H <sub>9</sub> Br (Br)                | -0.059 | -0.054 | C <sub>6</sub> H <sub>5</sub> I (H <sub>d</sub> )   | -0.203 | 0.207  | CHBr <sub>3</sub> (Br)                                 | -0.546 | 0.113  |
| C <sub>4</sub> H <sub>9</sub> Cl (H <sub>b</sub> )   | -0.587 | 0.211  | C <sub>6</sub> H <sub>5</sub> I (I)                 | -0.204 | 0.181  | CHCl <sub>3</sub> (H)                                  | -0.302 | 0.032  |
| C <sub>4</sub> H <sub>9</sub> Cl (Cl)                | -0.013 | -0.102 | C <sub>6</sub> H <sub>6</sub> NCl (H <sub>a</sub> ) | -0.346 | 0.207  | CHCl <sub>3</sub> (Cl)                                 | -0.302 | 0.204  |
| C <sub>4</sub> H <sub>9</sub> I (H <sub>b</sub> )    | -0.597 | 0.203  | C <sub>6</sub> H <sub>6</sub> NCl (H <sub>c</sub> ) | -0.22  | 0.215  | CHF <sub>3</sub> (H)                                   | 0.958  | 0.11   |
| C <sub>4</sub> H <sub>9</sub> I (I)                  | -0.13  | 0.04   | C <sub>6</sub> H <sub>6</sub> NCl (H <sub>d</sub> ) | -0.159 | 0.208  | CHF <sub>3</sub> (F)                                   | 0.958  | -0.356 |
| C <sub>5</sub> H <sub>4</sub> NCl (H <sub>a</sub> )  | -0.254 | 0.226  | C <sub>6</sub> H <sub>6</sub> NCl (H <sub>e</sub> ) | -0.236 | 0.212  | CHI <sub>3</sub> (H)                                   | -0.897 | 0.201  |
| C <sub>5</sub> H <sub>4</sub> NCl (H <sub>b</sub> )  | -0.151 | 0.211  | C <sub>6</sub> H <sub>6</sub> NCl (H <sub>f</sub> ) | 0.064  | 0.186  | CHI <sub>3</sub> (I)                                   | -0.897 | 0.232  |
| C <sub>5</sub> H <sub>4</sub> NCl (H <sub>c</sub> )  | -0.247 | 0.214  | C <sub>6</sub> H <sub>6</sub> NCl (Cl)              | -0.346 | -0.076 | CNCH <sub>2</sub> Br(H)                                | -0.523 | 0.249  |
| C <sub>5</sub> H <sub>4</sub> NCl (H <sub>d</sub> )  | 0.071  | 0.19   | C <sub>7</sub> H <sub>7</sub> Br (H <sub>a</sub> )  | -0.39  | 0.213  | CNCH <sub>2</sub> Br (Br)                              | -0.523 | 0.056  |
| C <sub>5</sub> H <sub>4</sub> NCl (Cl)               | -0.491 | 0.82   | C <sub>7</sub> H <sub>7</sub> Br (H <sub>c</sub> )  | -0.181 | 0.205  | CNCH <sub>2</sub> Cl (H)                               | -0.45  | 0.245  |
| C <sub>5</sub> H <sub>4</sub> NI (H <sub>a</sub> )   | 0.036  | 0.197  | C <sub>7</sub> H <sub>7</sub> Br (H <sub>d</sub> )  | -0.195 | 0.205  | CNCH <sub>2</sub> Cl (Cl)                              | -0.45  | -0.013 |
| C <sub>5</sub> H <sub>4</sub> NI (H <sub>b</sub> )   | -0.193 | 0.221  | C <sub>7</sub> H <sub>7</sub> Br (H <sub>e</sub> )  | -0.194 | 0.205  | CNCH <sub>2</sub> F (H)                                | 0.006  | 0.202  |
| C <sub>5</sub> H <sub>4</sub> NI (H <sub>c</sub> )   | -0.226 | 0.215  | C <sub>7</sub> H <sub>7</sub> Br (Br)               | -0.39  | -0.034 | CNCH <sub>2</sub> F (F)                                | 0.006  | -0.364 |
| C <sub>5</sub> H <sub>4</sub> NI (H <sub>d</sub> )   | 0.055  | 0.188  | C <sub>7</sub> H <sub>7</sub> Cl (H <sub>a</sub> )  | -0.328 | 0.207  | CNCH <sub>2</sub> I (H)                                | -0.628 | 0.251  |
| C <sub>5</sub> H <sub>4</sub> NI (I)                 | -0.251 | 0.197  | C <sub>7</sub> H <sub>7</sub> Cl (H <sub>c</sub> )  | -0.181 | 0.205  | CNCH <sub>2</sub> I (I)                                | -0.628 | 0.165  |
| C <sub>5</sub> H <sub>9</sub> Br (H <sub>a</sub> )   | -0.213 | 0.207  | C <sub>7</sub> H <sub>7</sub> Cl (H <sub>d</sub> )  | -0.195 | 0.205  | SC <sub>2</sub> H <sub>5</sub> Cl (H <sub>a</sub> )    | -0.525 | 0.218  |

|                                                    |        |        |                                                    |        |        |                                                     |        |        |
|----------------------------------------------------|--------|--------|----------------------------------------------------|--------|--------|-----------------------------------------------------|--------|--------|
| C <sub>5</sub> H <sub>9</sub> Br (H <sub>b</sub> ) | -0.405 | 0.217  | C <sub>7</sub> H <sub>7</sub> Cl (H <sub>c</sub> ) | -0.193 | 0.205  | SC <sub>2</sub> H <sub>5</sub> Cl (H <sub>c</sub> ) | -0.707 | 0.22   |
| C <sub>5</sub> H <sub>9</sub> Br (H <sub>c</sub> ) | -0.389 | 0.204  | C <sub>7</sub> H <sub>7</sub> Cl (Cl)              | -0.328 | -0.088 | SC <sub>2</sub> H <sub>5</sub> Cl (Cl)              | -0.525 | -0.079 |
| C <sub>5</sub> H <sub>9</sub> Br (Br)              | -0.213 | -0.049 | C <sub>7</sub> H <sub>7</sub> F (H <sub>a</sub> )  | 0.089  | 0.163  | SC <sub>2</sub> H <sub>5</sub> I (H <sub>a</sub> )  | -0.697 | 0.225  |
| C <sub>5</sub> H <sub>9</sub> Cl (H <sub>a</sub> ) | -0.156 | 0.203  | C <sub>7</sub> H <sub>7</sub> F (H <sub>c</sub> )  | -0.178 | 0.204  | SC <sub>2</sub> H <sub>5</sub> I (H <sub>c</sub> )  | -0.71  | 0.221  |
| C <sub>5</sub> H <sub>9</sub> Cl (H <sub>b</sub> ) | -0.402 | 0.216  | C <sub>7</sub> H <sub>7</sub> F (H <sub>d</sub> )  | -0.199 | 0.205  | SC <sub>2</sub> H <sub>5</sub> I (I)                | -0.697 | 0.052  |
| C <sub>5</sub> H <sub>9</sub> Cl (H <sub>c</sub> ) | -0.389 | 0.203  | C <sub>7</sub> H <sub>7</sub> F (H <sub>e</sub> )  | -0.19  | 0.205  |                                                     |        |        |
| C <sub>5</sub> H <sub>9</sub> Cl (Cl)              | -0.156 | -0.103 | C <sub>7</sub> H <sub>7</sub> F (F)                | 0.089  | -0.402 |                                                     |        |        |

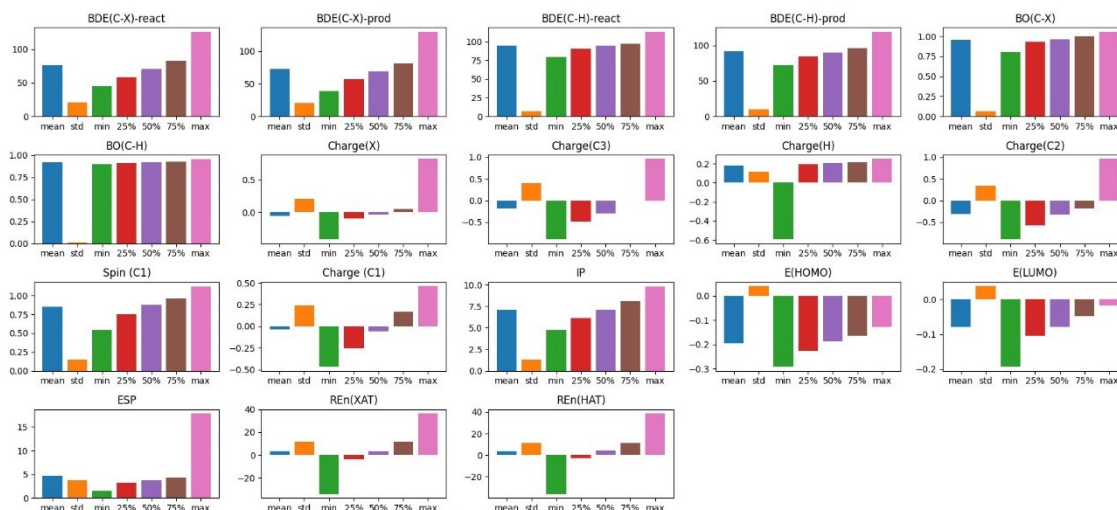

**Figure S6.** Distribution of phys-organic descriptors

### 2.3 Feature reduction based on Pearson relation coefficient

Pearson correlation analysis was performed as part of the feature selection process. The correlation coefficients for the 18 initial physical organic descriptors are presented in Figure S7, illustrating the degree of linear relationship between the features.

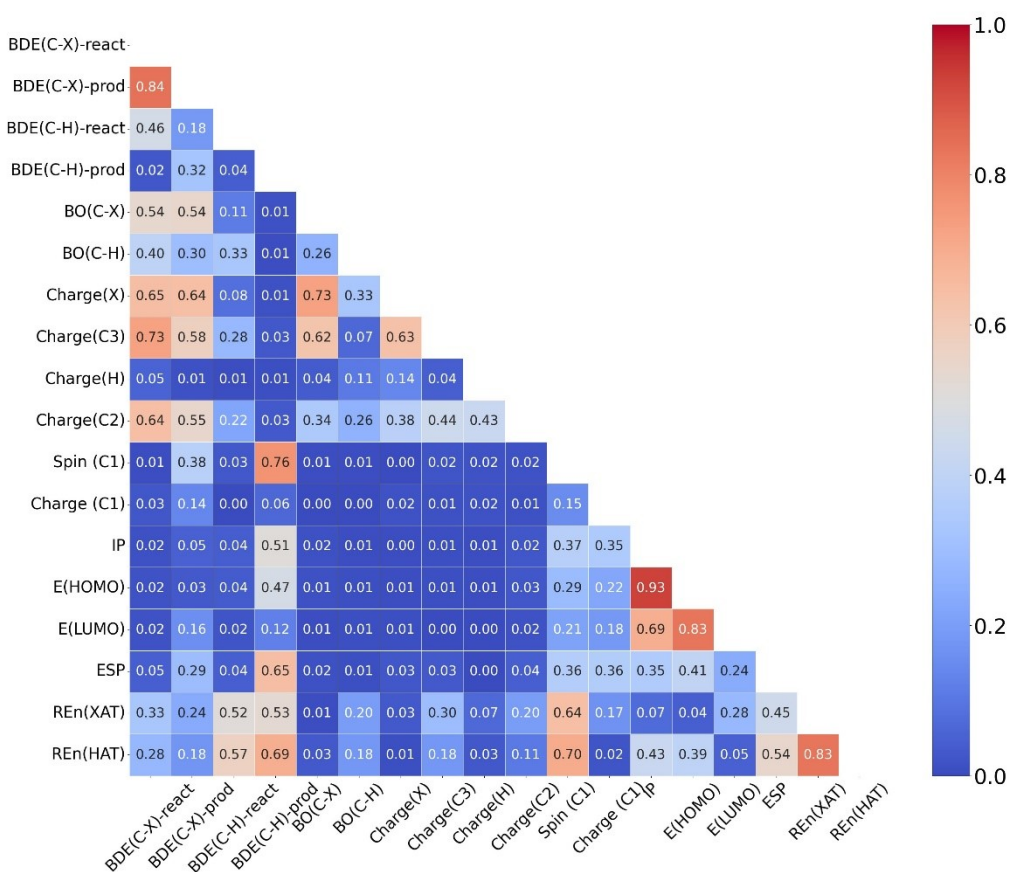

Figure S7. Pearson correlation coefficients of descriptors.

## 2.4 Machine learning algorithms

A series of widely used machine learning algorithms were evaluated for model development, including Bagging<sup>17</sup>, Gradient Boosting (GB)<sup>18, 19</sup>, Extra Tree, *k*-nearest neighbors regressor (KNN)<sup>20</sup>, Adaboost<sup>21</sup>, Multivariate Linear Regression (MLR)<sup>22</sup>, Ridge Regressor<sup>23</sup>, Lasso<sup>24</sup>, Support Vector Machine (SVM)<sup>25</sup>, Decision Tree (DT)<sup>26</sup>, Random Forest (RF)<sup>27</sup>. All models were implemented using the scikit-learn Python library<sup>28</sup>. Detailed hyperparameter configurations and ensemble settings for each algorithm are provided in Table S6; for any parameters not explicitly listed, default scikit-learn settings were maintained. The complete set of model-training scripts is hosted on our GitHub repository (<https://github.com/liusqchem/machine-learning.git>).

Table S6. 10-fold cross validation performance and hyperparameters for the evaluated machine learning algorithms.

| Model                                       | R <sup>2</sup> | MAE     | RMSE    | Main hyperparameters                                                |
|---------------------------------------------|----------------|---------|---------|---------------------------------------------------------------------|
| <b>Bagging</b>                              | 0.98852        | 0.86511 | 1.15737 | estimator=None, n_estimators=10, max_samples=1.0, max_features=1.0, |
| <b>Gradient Boosting</b>                    | 0.98856        | 0.8838  | 1.15506 | loss='squared_error', n_estimators=100                              |
| <b>Extra Tree</b>                           | 0.97349        | 1.20865 | 1.75862 | n_estimators=100, criterion='squared_error', min_samples_split=2    |
| <b><i>k</i>-nearest neighbors regressor</b> | 0.95307        | 1.85303 | 2.33995 | n_neighbors=5, weights='uniform', leaf_size=30                      |

|                                      |         |         |         |                                                                         |
|--------------------------------------|---------|---------|---------|-------------------------------------------------------------------------|
| <b>Adaboost</b>                      | 0.94562 | 2.08772 | 2.5189  | n_estimators=50, learning_rate=1.0, loss='linear',<br>random_state=None |
| <b>Multivariate Linear Regressor</b> | 0.91773 | 2.39126 | 3.09815 | -                                                                       |
| <b>Ridge Regressor</b>               | 0.91716 | 2.39927 | 3.10893 | alpha=1.0                                                               |
| <b>Lasso</b>                         | 0.69257 | 4.43712 | 5.98901 | alpha=1.0'                                                              |
| <b>Support Vector Machine</b>        | 0.93982 | 1.93337 | 2.64977 | kernel='rbf', degree=3                                                  |
| <b>Decision Tree</b>                 | 0.98173 | 1.06747 | 1.45981 | criterion='squared_error', min_samples_split=2                          |
| <b>Random Forest</b>                 | 0.99051 | 0.78561 | 1.05247 | n_estimators=100, criterion='squared_error',<br>min_samples_split=2,    |

## 2.5 Feature importance

### 2.5.1 Feature importance scores

The relative importance was evaluated using the feature importance metrics from RF, GB, Extra Trees, DT, and AdaBoost. Table S7 summarizes these scores, providing a basis for interpreting the chemical drivers of HAT/XAT selectivity.

**Table S7.** Feature importance scores of RF, GB, Extra tree, DT, AdaBoost and Bagging regressors.

| Feature   | RF      | AdaBoost | GB      | DT      | Extra Tree | Bagging |
|-----------|---------|----------|---------|---------|------------|---------|
| BDE(C-X)  | 0.67873 | 0.78153  | 0.58028 | 0.82925 | 0.60333    | 0.71955 |
| BO(C-X)   | 0.16003 | 0.03626  | 0.26268 | 0.00613 | 0.19964    | 0.11755 |
| IP        | 0.08507 | 0.09943  | 0.07969 | 0.08121 | 0.07626    | 0.08496 |
| E(LUMO)   | 0.03489 | 0.04317  | 0.03973 | 0.03898 | 0.02762    | 0.03516 |
| Charge C2 | 0.009   | 0.0132   | 0.01421 | 0.01213 | 0.04274    | 0.00937 |
| BDE(C-H)  | 0.00844 | 0.00606  | 0.00845 | 0.00833 | 0.01201    | 0.00852 |
| ESP       | 0.00567 | 0.00285  | 0.00294 | 0.00452 | 0.00954    | 0.00611 |
| Spin C1   | 0.00524 | 0.01026  | 0.00519 | 0.00415 | 0.00581    | 0.00548 |
| Charge H  | 0.00515 | 0.00197  | 0.00335 | 0.00766 | 0.00993    | 0.00515 |
| BO(C-H)   | 0.00436 | 0.0033   | 0.00211 | 0.00313 | 0.00671    | 0.00454 |
| Charge C1 | 0.00342 | 0.00198  | 0.00136 | 0.00451 | 0.00641    | 0.00362 |

### 2.5.2 Influence of feature set size

We investigated the impact of the number of input features on model performance by adding descriptors sequentially according to their RF-derived importance in Table S8. We found that utilizing the top seven features provides an ideal balance between simplicity and accuracy, delivering an  $R^2$  of 0.99 and an MAE of 0.82 kcal/mol for predicting  $\Delta\Delta G^\ddagger$ . This suggests that a subset of the most influential descriptors can effectively represent the reaction energetics.

**Table S8.** Influence of feature set size on the predictive accuracy (MAE and  $R^2$ ) of the RF regressor.

| Feature number | $R^2$   | MAE     | Detailed features              |
|----------------|---------|---------|--------------------------------|
| 2              | 0.85592 | 3.29731 | BDE(C-X), BO(C-X)              |
| 3              | 0.98045 | 1.13479 | BDE(C-X), BO(C-X), IP          |
| 4              | 0.98603 | 0.95918 | BDE(C-X), BO(C-X), IP, E(LUMO) |

|    |         |         |                                                                                                                                              |
|----|---------|---------|----------------------------------------------------------------------------------------------------------------------------------------------|
| 5  | 0.98685 | 0.93142 | BDE(C-X), BO(C-X), IP, E(LUMO), Charge (C <sub>2</sub> )                                                                                     |
| 6  | 0.98722 | 0.91648 | BDE(C-X), BO(C-X), IP, E(LUMO), Charge (C <sub>2</sub> ), BDE(C-H)                                                                           |
| 7  | 0.98913 | 0.82468 | BDE(C-X), BO(C-X), IP, E(LUMO), Charge (C <sub>2</sub> ), BDE(C-H), ESP                                                                      |
| 8  | 0.98961 | 0.81308 | BDE(C-X), BO(C-X), IP, E(LUMO), Charge (C <sub>2</sub> ), BDE(C-H), ESP, Spin (C <sub>1</sub> )                                              |
| 9  | 0.98977 | 0.8059  | BDE(C-X), BO(C-X), IP, E(LUMO), Charge (C <sub>2</sub> ), BDE(C-H), ESP, Spin (C <sub>1</sub> ), Charge (H)                                  |
| 10 | 0.98981 | 0.80482 | BDE(C-X), BO(C-X), IP, E(LUMO), Charge (C <sub>2</sub> ), BDE(C-H), ESP, Spin (C <sub>1</sub> ), Charge (H), BO(C-H)                         |
| 11 | 0.99007 | 0.79587 | BDE(C-X), BO(C-X), IP, E(LUMO), Charge (C <sub>2</sub> ), BDE(C-H), ESP, Spin (C <sub>1</sub> ), Charge H, BO(C-H), Charge (C <sub>1</sub> ) |

### 3. Results for silyl radicals

As shown in Figure S8A, the multivariate linear regression (MLR) model using  $BDE_{C-X}$  and  $IP$  as input features yields a relatively low correlation coefficient ( $R^2 = 0.59$ ) for silyl radicals, suggesting that additional or alternative descriptors may better capture the selectivity trends in silyl radical-induced atom transfer reactions. To identify more suitable features, we repeated the machine-learning-guided workflow by training a model on 116 DFT-computed  $\Delta\Delta G^\ddagger$  values and evaluating feature importance using the Random Forest (RF) algorithm.

The RF feature importance analysis revealed that  $BDE_{C-X}$  and  $BDE_{C-H}$  of the organic halides are the most influential descriptors for silyl radical reactivity. Based on this insight, we constructed a new MLR model using these two features. As illustrated in Figure S8B, this model shows a significantly improved correlation with DFT-computed values ( $R^2 = 0.86$ ), indicating that both C-X and C-H bond strengths play dominant roles in determining atom transfer selectivity for silyl radicals. Figure S8B also reveals that silyl radicals preferentially abstract Cl, Br, and I atoms over H atoms, and a small number of successful F atom transfer (FAT) events are also observed. These results highlight the effectiveness of the machine-learning-guided approach in uncovering reactivity patterns across diverse radical species and atom transfer scenarios.

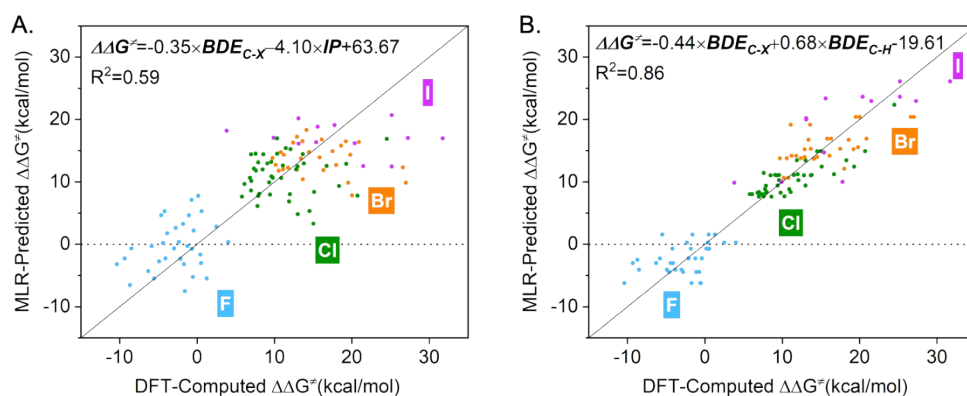

**Figure S8.** Correlation between DFT-computed  $\Delta\Delta G^\ddagger$  values and multivariate linear regression predictions for silyl radicals using (A)  $BDE_{C-X}$  and  $IP$ , and (B)  $BDE_{C-X}$  and  $BDE_{C-H}$  as input features.

### 4. References

1. Liu, S.; Su, Y.-L.; Sun, T.-Y.; Doyle, M. P.; Wu, Y.-D.; Zhang, X., Precise introduction of

the  $-\text{CH}_n\text{X}_{3-n}$  ( $X = \text{F}, \text{Cl}, \text{Br}, \text{I}$ ) moiety to target molecules by a radical strategy: A theoretical and experimental study. *J. Am. Chem. Soc.* **2021**, *143* (33), 13195-13204.

2. Frisch, M. J.; Trucks, G. W.; Schlegel, H. B.; Scuseria, G. E.; Robb, M. A.; Cheeseman, J. R.; Scalmani, G.; Barone, V.; Petersson, G. A.; Nakatsuji, H.; Li, X.; Caricato, M.; Marenich, A. V.; Bloino, J.; Janesko, B. G.; Gomperts, R.; Mennucci, B.; Hratchian, H. P.; Ortiz, J. V.; Izmaylov, A. F.; Sonnenberg, J. L.; Williams; Ding, F.; Lipparini, F.; Egidi, F.; Goings, J.; Peng, B.; Petrone, A.; Henderson, T.; Ranasinghe, D.; Zakrzewski, V. G.; Gao, J.; Rega, N.; Zheng, G.; Liang, W.; Hada, M.; Ehara, M.; Toyota, K.; Fukuda, R.; Hasegawa, J.; Ishida, M.; Nakajima, T.; Honda, Y.; Kitao, O.; Nakai, H.; Vreven, T.; Throssell, K.; Montgomery Jr., J. A.; Peralta, J. E.; Ogliaro, F.; Bearpark, M. J.; Heyd, J. J.; Brothers, E. N.; Kudin, K. N.; Staroverov, V. N.; Keith, T. A.; Kobayashi, R.; Normand, J.; Raghavachari, K.; Rendell, A. P.; Burant, J. C.; Iyengar, S. S.; Tomasi, J.; Cossi, M.; Millam, J. M.; Klene, M.; Adamo, C.; Cammi, R.; Ochterski, J. W.; Martin, R. L.; Morokuma, K.; Farkas, O.; Foresman, J. B.; Fox, D. J. *Gaussian 16 Rev. C.01*, Wallingford, CT, 2016.

3. Grimme, S.; Ehrlich, S.; Goerigk, L., Effect of the damping function in dispersion corrected density functional theory. *J. Comput. Chem.* **2011**, *32*, 1456-1465.

4. Becke, A. D., Density-functional exchange-energy approximation with correct asymptotic behavior. *Phys. Rev. A* **1988**, *38*, 3098-3100.

5. Lee, C.; Yang, W.; Parr, R. G., Development of the Colle-Salvetti correlation-energy formula into a functional of the electron density. *Phys. Rev. B* **1988**, *37*, 785-789.

6. Becke, A. D., Density-functional thermochemistry. III. The role of exact exchange. *J. Chem. Phys.* **1993**, *98*, 5648-5652.

7. Wadt, W. R.; Hay, P. J., Ab initio effective core potentials for molecular calculations - Potentials for main group elements Na to Bi. *J. Chem. Phys.* **1985**, *82*, 284-298.

8. Hollwarth, A.; Bohme, M.; Dapprich, S.; Ehlers, A. W.; Gobbi, A.; Jonas, V.; Kohler, K. F.; Stegmann, R.; Veldkamp, A.; Frenking, G., A set of d-polarization functions for pseudo-potential basis-sets of the main-group elements Al-Bi and f-type polarization functions for Zn, Cd, Hg. *Chem. Phys. Lett.* **1993**, *208*, 237-240.

9. Merrick, J. P.; Moran, D.; Radom, L., An evaluation of harmonic vibrational frequency scale factors. *J. Phys. Chem. A* **2007**, *111*, 11683-11700.

10. Staroverov, V. N.; Scuseria, G. E.; Tao, J. M.; Perdew, J. P., Comparative assessment of a new nonempirical density functional: Molecules and hydrogen-bonded complexes. *J. Chem. Phys.* **2003**, *119*, 12129-12137.

11. Igelmann, G.; Stoll, H.; Preuss, H., Pseudopotentials for main group elements (IIIA through VIIIA). *Mol. Phys.* **1988**, *65*, 1321-1328.

12. Bergner, A.; Dolg, M.; Kuchle, W.; Stoll, H.; Preuss, H., Ab-initio energy-adjusted pseudopotentials for elements of groups 13-17. *Mol. Phys.* **1993**, *80*, 1431-1441.

13. Wiberg, K. B., Application of the pople-santry-segal CNDO method to the cyclopropylcarbinyl and cyclobutyl cation and to bicyclobutane. *Tetrahedron* **1968**, *24*, 1083-1096.

14. Reed, A. E.; Weinstock, R. B.; Weinhold, F., Natural population analysis. *J. Chem. Phys.* **1985**, *83*, 735-746.

15. Mulliken, R. S., Electronic population analysis on LCAO-MO molecular wave functions. I. *J. Chem. Phys.* **1955**, *23*, 1833-1840.

16. Lu, T.; Chen, F. J. J. o. c. c., Multiwfn: A multifunctional wavefunction analyzer. *J. Comput. Chem.*

2012, 33, 580-592.

17. Breiman, L., Bagging predictors. *Mach. Learn.* **1996**, 24, 123-140.
18. Lundberg, S. M.; Erion, G.; Chen, H.; DeGrave, A.; Prutkin, J. M.; Nair, B.; Katz, R.; Himmelfarb, J.; Bansal, N.; Lee, S.-I., From local explanations to global understanding with explainable AI for trees. *Nat. Mach. Intell.* **2020**, 2, 56-67.
19. Ke, G.; Meng, Q.; Finley, T.; Wang, T.; Chen, W.; Ma, W.; Ye, Q.; Liu, T.-Y. In *LightGBM: A Highly Efficient Gradient Boosting Decision Tree*, 31st Annual Conference on Neural Information Processing Systems (NIPS), Long Beach, CA, 2017.
20. Song, Y.; Liang, J.; Lu, J.; Zhao, X., An efficient instance selection algorithm for k nearest neighbor regression. *Neurocomputing* **2017**, 251, 26-34.
21. Schapire, R. E.; Singer, Y., Improved boosting algorithms using confidence-rated predictions. *Mach. Learn.* **1999**, 37, 297-336.
22. Santiago, C. B.; Guo, J.-Y.; Sigman, M. S., Predictive and mechanistic multivariate linear regression models for reaction development. *Chem. Sci.* **2018**, 9, 2398-2412.
23. Garcia, C. B.; Garcia, J.; Lopez Martin, M. M.; Salmeron, R., Collinearity: revisiting the variance inflation factor in ridge regression. *J. Appl. Stat.* **2015**, 42, 648-661.
24. Friedman, J.; Hastie, T.; Tibshirani, R., Regularization paths for generalized linear models via coordinate descent. *J. Stat. Softw.* **2010**, 33, 1.
25. Burges, C. J. C., A Tutorial on Support Vector Machines for Pattern Recognition. *Data Min. Knowl. Disc.* **1998**, 2, 121-167.
26. Ture, M.; Tokatli, F.; Kurt, I., Using Kaplan–Meier analysis together with decision tree methods (C&RT, CHAID, QUEST, C4.5 and ID3) in determining recurrence-free survival of breast cancer patients. *Expert Syst. Appl.* **2009**, 36 (2, Part 1), 2017-2026.
27. Breiman, L., Random forests. *Mach. Learn.* **2001**, 45, 5-32.
28. Pedregosa, F.; Varoquaux, G.; Gramfort, A.; Michel, V.; Thirion, B.; Grisel, O.; Blondel, M.; Prettenhofer, P.; Weiss, R.; Dubourg, V.; Vanderplas, J.; Passos, A.; Cournapeau, D.; Brucher, M.; Perrot, M.; Duchesnay, E., Scikit-learn: Machine Learning in Python. *J. Mach. Learn. Res.* **2011**, 12, 2825-2830.
